# Supplementary material for: Online Patient Recruitment in Clinical Trials: Systematic Review and Meta-Analysis
Source: PubMed Central journal article supplement (PMC7673977; doi:10.2196/22179), 2020-11-04
Supplement: jmir_v22i11e22179_app1.pdf [file jmir_v22i11e22179_app1.pdf]

| Study           | Location by country | Year | Study design*              | Details                                                                                                                    | Paid advertisements on social media or Google | Age         | Gender             | Hard-to-reach population | Conclusion                                       | Risk of Bias* |
|-----------------|---------------------|------|----------------------------|----------------------------------------------------------------------------------------------------------------------------|-----------------------------------------------|-------------|--------------------|--------------------------|--------------------------------------------------|---------------|
| Juraseck et al. | USA                 | 2018 | RCT                        | Comparing online advertising cost-effectiveness form of recruitment to traditional forms of recruitment                    | yes                                           | > 18        | Not specified      | no                       | Offline recruitment superior to online           | "Low risk"    |
| Witzel et al.   | UK                  | 2019 | RCT                        | The study uses online recruitment to recruit UK MSM and trans women who have sex with men                                  | yes                                           | > 16 years  | Men or transgender | yes                      | Online recruitment was effective                 | "Low risk"    |
| Morgan et al.   | Australia           | 2013 | RCT                        | Uses online recruitment sources for an online depression prevention intervention                                           | yes                                           | >18 years   | Not specified      | yes                      | Online recruitment was effective                 | "Low risk"    |
| Buller et al.   | USA                 | 2012 | RCT                        | The study compares 4 different recruitment methods, including both online and offline methods                              | yes                                           | 18-30 years | Not specified      | no                       | Online and offline recruitment equally effective | "Low risk"    |
| Schwinn et al.  | USA                 | 2017 | Behavioural research trial | Uses Facebook ads and traditional paper mailings to recruit adolescent girls for a longitudinal web-based prevention trial | yes                                           | 13-14 years | Women              | yes                      | Online recruitment was effective                 | "Low risk"    |
| Cowie et al.    | USA                 | 2018 | RCT                        | Report on the use of social media to recruit elderly people over 60 years                                                  | yes                                           | 60-78 years | Not specified      | no                       | Online recruitment was effective                 | "Low risk"    |

|                 |           |      |     |                                                                                                                                                                                                          |     |             |               |     |                                        |                 |
|-----------------|-----------|------|-----|----------------------------------------------------------------------------------------------------------------------------------------------------------------------------------------------------------|-----|-------------|---------------|-----|----------------------------------------|-----------------|
| Jones et al.    | USA       | 2017 | RCT | Uses Facebook to recruit young urban african american or black women for a HIV prevention trial                                                                                                          | yes | 18-29 years | Women         | yes | Online recruitment was effective       | "Some concerns" |
| Bracken et al.  | Australia | 2019 | RCT | The study evaluates different recruitment strategies to recruit for a multi-center T2D prevention RCT                                                                                                    | yes | 50-74 years | Men           | no  | Offline recruitment superior to online | "Low risk"      |
| Shere et al.    | Canada    | 2014 | RCT | Compares yearly recruitment rates in two studies, a phase 1 study using traditional recruitment methods with a phase 2 study adding social media recruitment                                             | yes | 18-45 years | Women         | yes | Online recruitment was effective       | "Some concerns" |
| Frandsen et al. | Australia | 2016 | RCT | The study investigates how patients recruited through social media progress through a study compared to patients recruited through traditional methods                                                   | yes | >18 years   | Not specified | no  | Offline recruitment superior to online | "Some concerns" |
| Wozney et al.   | Canada    | 2019 | RCT | The study evaluates the impact and cost-effectiveness of ads for recruitment into a trial testing an Internet-based, coached intervention for parents of children with Fetal Alcohol Spectrum Disorders. | yes | 18-60 years | Not specified | yes | Online recruitment was effective       | "Low risk"      |

|                         |         |      |                                       |                                                                                                                                                                   |     |             |               |     |                                  |                 |
|-------------------------|---------|------|---------------------------------------|-------------------------------------------------------------------------------------------------------------------------------------------------------------------|-----|-------------|---------------|-----|----------------------------------|-----------------|
| Graham et al.           | USA     | 2008 | Online survey                         | The study compares the impact of online advertising to traditional recruitment approaches for a smoking cessation intervention                                    | no  | >18 years   | Not specified | yes | Online recruitment was effective | "Low risk"      |
| Graham et al.           | USA     | 2012 | Online survey                         | Phase II of the study examines the effect of online ads in recruiting Latino smokers to a internet cessation intervention                                         | no  | >18 years   | Not specified | yes | Online recruitment was effective | "Low risk"      |
| Christensen et al.      | Denmark | 2017 | Observational research trial          | The study compares online and offline recruitment methods for a prospective cohort study on fertility                                                             | no  | 18-45 years | Women         | yes | Online recruitment was effective | "Low risk"      |
| Hernandez-Romieu et al. | USA     | 2014 | Observational research (trial itself) | The study compares recruitment of MSM via venue-time-space sampling with Facebook recruitment                                                                     | yes | >18 years   | Men           | yes | Online recruitment was effective | "Some concerns" |
| Ramo et al.             | USA     | 2010 | Online survey                         | The study compared three recruitment methods, including internet advertising, for young adult smokers to complete a survey about tobacco and other substance use: | yes | 18-25 years | Not specified | yes | Online recruitment was effective | "Low risk"      |
| Adam et al.             | Canada  | 2016 | RCT                                   | The study compares efficacy of using FB paid ads recruitment of pregnant women to a RCT with traditional recruitment methods                                      | yes | 23-40 years | women         | yes | Online recruitment was effective | "Some concerns" |

|                      |           |      |                              |                                                                                                                                                 |     |             |               |     |                                        |            |
|----------------------|-----------|------|------------------------------|-------------------------------------------------------------------------------------------------------------------------------------------------|-----|-------------|---------------|-----|----------------------------------------|------------|
| Pedersen et al.      | USA       | 2015 | Behavioural research trial   | The study utilises Facebook to recruit veterans for an online alcohol intervention study                                                        | yes | 18-34 years | Not specified | yes | Online recruitment was effective       | "Low risk" |
| Ramo et al.          | USA       | 2014 | Online survey                | Uses Facebook to recruit for a smoking cessation intervention trial                                                                             | yes | 18-25 years | Not specified | yes | Online recruitment was effective       | "Low risk" |
| Rait et al.          | USA       | 2015 | Observational research trial | Uses Social Media and traditional methods to recruit for a study examining the influence of metabolism on the development of nicotine addiction | yes | 13-17 years | Not specified | yes | Offline recruitment superior to online | "Low risk" |
| Carter-Harris et al. | USA       | 2018 | Online survey                | Uses Facebook ads to recruit long-term smokers eligible for lung cancer screening for a descriptive cross-sectional survey                      | yes | 55-77 years | Not specified | yes | Online recruitment was effective       | "Low risk" |
| Choi et al.          | Australia | 2017 | Behavioural research trial   | The study uses Facebook ads to recruit for an online mental health study                                                                        | yes | >18 years   | Not specified | no  | No conclusion on effectiveness         | "Low risk" |

|                  |           |      |     |                                                                                                                                                                                                      |     |             |               |     |                                        |                 |
|------------------|-----------|------|-----|------------------------------------------------------------------------------------------------------------------------------------------------------------------------------------------------------|-----|-------------|---------------|-----|----------------------------------------|-----------------|
| Partridge et al. | Australia | 2015 | RCT | Compares recruitment through facebook/google ads with letters from GP and print media for a RCT on healthy lifestyle intervention for weight gain prevention in young adults                         | yes | 18-35 years | Not specified | no  | Offline recruitment superior to online | "Low risk"      |
| Raviotta et al.  | USA       | 2016 | RCT | Compares recruitment through Facebook ads for a RCT on immunological responses to HIV vaccine with traditional methods                                                                               | yes | 18-25 years | Men           | yes | Online recruitment was effective       | "Low risk"      |
| Moreno et al.    | USA       | 2017 | RCT | The study compares traditional in-person recruitment methods to recruitment through social media for a physical intervention pilot study in adolescent . Includes wearable tracking device (FitBit). | yes | 14-18 years | Not specified | no  | Online recruitment was effective       | "Low risk"      |
| Akers et al.     | USA       | 2018 | RCT | The study uses FB to recruit women for a RCT to teach support skills to female partners of male tobacco smokers                                                                                      | yes | 25-65       | women         | yes | Online recruitment was effective       | "Low risk"      |
| Watson et al.    | USA       | 2018 | RCT | Uses traditional recruitment, web-based recruitment and online survey panel to recruit for a RCT smoking cessation trial                                                                             | yes | >18 years   | Not specified | yes | Online recruitment was effective       | "Some concerns" |

|                   |        |      |                              |                                                                                                                                                                 |     |             |               |     |                                  |                 |
|-------------------|--------|------|------------------------------|-----------------------------------------------------------------------------------------------------------------------------------------------------------------|-----|-------------|---------------|-----|----------------------------------|-----------------|
| Carmi et al.      | Israel | 2014 | Observational research trial | The study uses a google search based tool developed to enhance patient recruitment and compares online recruitment with print-based recruitment                 | no  | >18 years   | Not specified | no  | Online recruitment was effective | "Low risk"      |
| Buckingham et al. | USA    | 2017 | RCT                          | compare the use of social media and street outreach to recruit men who have sex with men (MSM) and transgender women to a phase 2b HIV prevention vaccine trial | yes | >18 years   | Not specified | yes | Online recruitment was effective | "Some concerns" |
| Bailey et al.     | UK     | 2013 | RCT                          | Addresses the feasibility of amongst other online recruitment for an online RCT regarding sexually transmitted diseases                                         | yes | 16-20 years | Not specified | yes | Online recruitment was effective | "Low risk"      |
| Munoz et al.      | USA    | 2012 | RCT (the trial itself)       | illustrate that Internet interventions designed to conduct RCTs can be adapted to serve as universal health care resources                                      | no  | >18 years   | Not specified | no  | Online recruitment was effective | "Low risk"      |
| Ingersoll et al.  | USA    | 2018 | Pilot RCT (the trial itself) | Uses online ads for recruitment for a pilot RCT investigating internet-delivered intervention to reduce the risk of alcohol-exposed pregnancy.                  | yes | 18-44 years | Women         | no  | Online recruitment was effective | "Low risk"      |

|                   |             |      |                        |                                                                                                                                                            |     |             |               |     |                                  |            |
|-------------------|-------------|------|------------------------|------------------------------------------------------------------------------------------------------------------------------------------------------------|-----|-------------|---------------|-----|----------------------------------|------------|
| Buller et al.     | Canada      | 2015 | RCT (the trial itself) | Patients were recruited through online promotions nationwide for a RCT evaluating the effect of a smartphone sun-safe application                          | yes | >18 years   | Not specified | no  | no conclusion on effectiveness   | "Low risk" |
| Schaub et al.     | Switzerland | 2012 | RCT (the trial itself) | Uses both online and offline media to recruit for a web-based RCT investigating an intervention to reduce cocaine consumption in problematic cocaine users | yes | >18 years   | Not specified | yes | no conclusion on effectiveness   | "Low risk" |
| Heckmann et al.   | USA         | 2017 | RCT (the trial itself) | Uses online recruitment for an online intervention on skin cancer risk reduction in young people                                                           | no  | 18-25 years | Not specified | no  | no conclusion on effectiveness   | "Low risk" |
| Van Lettow et al. | Netherlands | 2015 | RCT (the trial itself) | Uses both online and traditional methods to recruit for an online RCT on an intervention on alcohol consumption                                            | no  | >18 years   | Not specified | yes | no conclusion on effectiveness   | "Low risk" |
| Cobb et al.       | USA         | 2016 | RCT (the trial itself) | Smoking cessation trial conducted entirely through Facebook                                                                                                | yes | >18 years   | Not specified | yes | Online recruitment was effective | "Low risk" |
| Irvine et al.     | USA         | 2013 | RCT (the trial itself) | Uses online recruitment for an internet intervention to promote physical activity by sedentary older adults                                                | yes | >55 years   | Not specified | yes | no conclusion on effectiveness   | "Low risk" |

|                |           |      |                              |                                                                                                                       |     |             |               |     |                                  |                 |
|----------------|-----------|------|------------------------------|-----------------------------------------------------------------------------------------------------------------------|-----|-------------|---------------|-----|----------------------------------|-----------------|
| Kuhn et al.    | USA       | 2017 | RCT (the trial itself)       | Uses online ads to recruit for a RCT of a smartphone app for PTSD symptoms                                            | yes | >18 years   | Not specified | yes | no conclusion on effectiveness   | "Low risk"      |
| Jonas B et al. | Germany   | 2016 | RCT (the trial itself)       | Uses online and in-house recruitment for an internet-based intervention for burnout in the German population          | yes | >18 years   | Not specified | no  | no conclusion on effectiveness   | "Low risk"      |
| Gordon et al.  | USA       | 2006 | RCT                          | Report evaluating recruitment methods (online and traditional) for a RCT on a web-based program for smoking cessation | yes | >18 years   | Not specified | yes | Online recruitment was effective | "Some concerns" |
| Bull et al.    | USA       | 2004 | Online survey                | Evaluates recruitment rates in an internet-based RCT to increase STD prevention in MSM                                | no  | >18 years   | Men           | yes | Online recruitment was effective | "Low risk"      |
| Bull et al.    | USA       | 2008 | RCT                          | Presents recruitment findings for an online RCT on HIV prevention                                                     | no  | 15-25 years | Men           | yes | Online recruitment was effective | "Low risk"      |
| Das et al.     | Australia | 2017 | Observational research trial | Using Facebook to Recruit Young Australian Men Into a Cross-Sectional Human Papillomavirus Study                      | yes | 18-35 years | Men           | no  | Online recruitment was effective | "Low risk"      |



|                |     |      |                              |                                                                                                           |     |           |               |     |                                  |                 |
|----------------|-----|------|------------------------------|-----------------------------------------------------------------------------------------------------------|-----|-----------|---------------|-----|----------------------------------|-----------------|
| Anguera et al. | USA | 2015 | RCT (the trial itself)       | Uses traditional, social media, and search-engine recruitment for a fully mobile RCT on depression        | yes | >18 years | Not specified | yes | Online recruitment was effective | "Low risk"      |
| Bricker et al. | USA | 2013 | Pilot RCT (the trial itself) | Uses both online and traditional methods to recruit for an online RCT on a smoking cessation intervention | yes | >18 years | Not specified | yes | no conclusion on effectiveness   | "Low risk"      |
| Brodar et al.  | USA | 2016 | RCT                          | Uses both online and traditional methods to identify diverse smokers                                      | yes | >18 years | Not specified | yes | Online recruitment was effective | "Some concerns" |
| Raymond et al. | USA | 2009 | RCT                          | Compares remote and traditional recruitment for sampling MSM in San Francisco                             | yes | >18 years | Men           | yes | Online recruitment was effective | "Some concerns" |
| Parsons et al. | USA | 2012 | Behavioural research trial   | Compares remote and traditional recruitment for sampling MSM for a behavioural trial                      | yes | >18 years | Men           | yes | Online recruitment was effective | "Some concerns" |
| Heffner et al. | USA | 2013 | RCT                          | Compare recruitment methods for web-based intervention on tobacco use                                     | yes | >18 years | Not specified | yes | Online recruitment was effective | "Some concerns" |
| Cobb et al.    | USA | 2014 | RCT                          | Recruitment through Facebook ads for an internet-based RCT on smoking cessation conducted through an app  | yes | >18 years | not specified | yes | Online recruitment was effective | "Low risk"      |

|                 |           |      |                                       |                                                                                                                                     |     |             |               |     |                                  |            |
|-----------------|-----------|------|---------------------------------------|-------------------------------------------------------------------------------------------------------------------------------------|-----|-------------|---------------|-----|----------------------------------|------------|
| Maloni et al.   | USA       | 2013 | Observational research (trial itself) | Exploratory study on feasibility of social media recruiting of women with postpartum depression after pregnancy complication.       | no  | >18 years   | women         | yes | Online recruitment was effective | "Low risk" |
| Bowen et al.    | USA       | 2004 | RCT                                   | Compares traditional and remote recruitment methods for sampling rural MSM for a HIV risk trial                                     | no  | >18 years   | Men           | yes | Online recruitment was effective | "Low risk" |
| MacDonnel et al | USA       | 2019 | Behavioural research trial            | Uses ads on social media including FB to recruit a hidden population of women for an alcohol-exposed pregnancy risk reduction study | yes | >18 years   | women         | yes | Online recruitment was effective | "Low risk" |
| Prescott et al  | USA       | 2016 | Prevention study                      | Reaches young, gay, bisexual and queer men online through social media advertising including Facebook campaigns                     | yes | 14-18 years | Men           | yes | Online recruitment was effective | "Low risk" |
| Yuan et al      | USA       | 2014 | Cross-sectional survey                | Uses social media advertisements to recruit HIV-positive participants for a cross-sectional survey                                  | yes | >18 years   | Men           | yes | Online recruitment was effective | "Low risk" |
| Clarke et al    | Australia | 2019 | RCT                                   | Uses Google and Facebook to recruit for a web-based therapy to improve social functioning in adults with type 2 Diabetes mellitus.  | yes | >18 years   | not specified | no  | no conclusion on effectiveness   | "Low risk" |
