# Supplementary material for: Online Patient Recruitment in Clinical Trials: Systematic Review and Meta-Analysis
Source: PubMed Central journal article supplement (PMC7673977; doi:10.2196/22179), 2020-11-04
Supplement: jmir_v22i11e22179_app2.pdf [file jmir_v22i11e22179_app2.pdf]

| Study                   | Location by country | Year | Study design*                         | Enrollment rate months (online) No. patients enrolled per month | Enrollment rate months (offline) No. patients enrolled per month | Enrollment rate active campaign days (online) No. patients enrolled per day | Enrollment rate active days (offline) No. patients enrolled per day | Conversion rate (online) | Conversion rate (offline) |
|-------------------------|---------------------|------|---------------------------------------|-----------------------------------------------------------------|------------------------------------------------------------------|-----------------------------------------------------------------------------|---------------------------------------------------------------------|--------------------------|---------------------------|
| Juraseck et al.         | USA                 | 2018 | RCT                                   | 0,7                                                             | 6,4                                                              | NA                                                                          | NA                                                                  | 67%                      | 78%                       |
| Jones et al.            | USA                 | 2017 | RCT                                   | 22                                                              | 13,4                                                             | 0,8                                                                         | 0,5                                                                 | 16%                      | 19%                       |
| Bracken et al.          | Australia           | 2019 | RCT                                   | 0,5                                                             | 0,6                                                              | 0,1                                                                         | 0,02                                                                | 2%                       | 6%                        |
| Frandsen et al.         | Australia           | 2016 | RCT                                   | 6,6                                                             | 5,9                                                              | NA                                                                          | NA                                                                  | 40%                      | 60%                       |
| Hernandez-Romieu et al. | USA                 | 2014 | Observational research (trial itself) | 4,8                                                             | 23,1                                                             | NA                                                                          | NA                                                                  | 8%                       | 8%                        |
| Adam et al.             | Canada              | 2016 | RCT                                   | 25                                                              | 6,4                                                              | 0,9                                                                         | 0,2                                                                 | 63%                      | 69%                       |
| Rait et al.             | USA                 | 2015 | Observational research trial          | 1,5                                                             | 5,2                                                              | NA                                                                          | NA                                                                  | 11%                      | 22%                       |
| Partridge et al.        | Australia           | 2015 | RCT                                   | 5,6                                                             | 8,7                                                              | 1,5                                                                         | 0,3                                                                 | 58%                      | 56%                       |

|                   |        |      |                              |       |       |      |     |     |      |
|-------------------|--------|------|------------------------------|-------|-------|------|-----|-----|------|
| Moreno et al.     | USA    | 2017 | RCT                          | 1,6   | 7,5   | NA   | NA  | 38% | 41%  |
| Watson et al.     | USA    | 2018 | RCT                          | 148,5 | 37,3  | NA   | NA  | NA  | NA   |
| Carmi et al.      | Israel | 2014 | Observational research trial | 1,6   | 0,8   | NA   | NA  | 20% | 15%  |
| Buckingham et al. | USA    | 2017 | RCT                          | 2,2   | 2,6   | NA   | NA  | 8%  | 12%  |
| Gordon et al.     | USA    | 2006 | RCT                          | 58,7  | 109,5 | NA   | NA  | NA  | NA   |
| Bull et al.       | USA    | 2004 | Online survey                | 56,8  | 36,7  | 4    | 1,9 | NA  | NA   |
| Anguera et al.    | USA    | 2015 | RCT (the trial itself)       | 64,4  | 520,2 | NA   | NA  | NA  | NA   |
| Brodar et al.     | USA    | 2016 | RCT                          | 79,3  | 92    | NA   | NA  | NA  | NA   |
| Raymond et al.    | USA    | 2009 | RCT                          | 147   | 11,2  | 31,5 | 0,4 | 49% | 100% |

|                   |           |      |                              |       |       |     |     |     |     |
|-------------------|-----------|------|------------------------------|-------|-------|-----|-----|-----|-----|
| Parsons et al.    | USA       | 2012 | Behavioural research trial   | 169,3 | 115,7 | 6,3 | 4,3 | 32% | 30% |
| Heffner et al.    | USA       | 2013 | RCT                          | 47,7  | 26,7  | NA  | NA  | NA  | NA  |
| Christensen et al | Denmark   | 2017 | Observational research trial | 30,5  | 10,3  | NA  | NA  | NA  | NA  |
| Shere et al       | Canada    | 2014 | RCT                          | 6,4   | 0,8   | NA  | NA  | NA  | NA  |
| Byaruhanga et al  | Australia | 2019 | Observational research trial | 34,2  | 1     | NA  | NA  | NA  | NA  |
| William et al     | USA       | 2012 | Behavioural research trial   | 4,1   | 6,5   | NA  | NA  | NA  | NA  |
