# Supplementary material for: Online Patient Recruitment in Clinical Trials: Systematic Review and Meta-Analysis
Source: PubMed Central journal article supplement (PMC7673977; doi:10.2196/22179), 2020-11-04
Supplement: jmir_v22i11e22179_app3.pdf [file jmir_v22i11e22179_app3.pdf]

| <b>Study</b>            | <b>Cost per enrollee<br/>(online)</b> | <b>Cost per enrollee<br/>(offline)</b> |
|-------------------------|---------------------------------------|----------------------------------------|
| Jones et al.            | 66.46 USD                             | 149.62 USD                             |
| Bracken et al.          | 251.2 USD                             | 794.7 USD                              |
| Frandsen et al.         | 36.7 USD                              | 34.1 USD                               |
| Hernandez-Romieu et al. | 68.6 USD                              | 91.2 USD                               |
| Rait et al.             | 149.64 USD                            | 43.78 USD                              |
| Partridge et al.        | 23.9 USD                              | 84 USD                                 |
| Moreno et al.           | 41 USD                                | 19.1 USD                               |
| Watson et al.           | 31.89 USD                             | 20.3 USD                               |
| Gordon et al.           | 3.9 USD                               | 134.8 USD                              |
| Brodar et al.           | 8.3 USD                               | 23.2 USD                               |
| Heffner et al.          | 32.2 USD                              | 105.3 USD                              |
| Byaruhanga et al        | 41.26 USD                             | 839 USD                                |

|                |            |         |
|----------------|------------|---------|
| Williams et al | 179.29 USD | 253 USD |
|----------------|------------|---------|

|                            |               |                |
|----------------------------|---------------|----------------|
| <b>Total Average costs</b> | <b>72 USD</b> | <b>199 USD</b> |
|----------------------------|---------------|----------------|
